# Supplementary material for: Downregulating p22phox ameliorates inflammatory response in Angiotensin II-induced oxidative stress by regulating MAPK and NF-κB pathways in ARPE-19 cells
Source: PubMed Central journal article supplement (PMC4586461; doi:10.1038/srep14362), 2015-09-29
Supplement: srep14362-s1.pdf [file srep14362-s1.pdf]

**Downregulating p22phox ameliorates inflammatory response in Angiotensin II-induced oxidative stress by regulating MAPK and NF- $\kappa$ B pathways in ARPE-19 cells**

Yiguo Qiu<sup>1</sup>, Lifei Tao<sup>1</sup>, Chunyan Lei<sup>1</sup>, Jiaming Wang<sup>1</sup>, Peizeng Yang<sup>1</sup>, Qihong Li<sup>2</sup>,  
Bo Lei<sup>1</sup>

**Table S1.** Sequences of the primers

| Primer                | Forward                               | Reverse                                 |
|-----------------------|---------------------------------------|-----------------------------------------|
| P22phox               | 5'-AACGAGCAGGCGCTGGCGTCCG-3'          | 5'-GCTTGGGCTCGATGGGCGTCCACT-3'          |
| MCP-1                 | 5'-CTCATAGCAGCCACCTTCATTC-3'          | 5'-TCACAGCTCTTTGGGACACTT-3'             |
| IL-8                  | 5'-GACATACTCCAAACCTTTCCACCC-3'        | 5'-CCAGACAGAGCTCTCTTCCATCAG-3'          |
| IL-6                  | 5'-AGTGAGGAACAAGCCAGAGC-3'            | 5'-CAGGGGTGGTTATTGCATCT-3'              |
| NOX-1                 | 5'-TTCACCAATCCCAGGATTGAAGTGGATGGTC-3' | 5'-GACCTGTCACGATGTCAGTGGCCTTGTC-3'      |
| NOX-2                 | 5'-AGAGGGTTGGAGGTGGAGAATT-3'          | 5'-GCACAAGGAGCAGGACTAGATGA-3'           |
| NOX4                  | 5'-CTGGAGGAGCTGGCTCGCCAACGAAG-3'      | 5'-GTGATCATGAGGAATAGCACCACCACCATGCAG-3' |
| I $\kappa$ B $\alpha$ | 5'-CGGACTGCCCTTCACCTC-3'              | 5'-ACATCAGCCCCACACTTCAA-3'              |
| $\beta$ -actin        | 5'-GGATGCAGAAGGAGATCACTG-3'           | 5'-CGATCCACACGGAGTACTTG-3'              |
