# Supplementary material for: Downregulating p22phox ameliorates inflammatory response in Angiotensin II-induced oxidative stress by regulating MAPK and NF-κB pathways in ARPE-19 cells
Source: PubMed Central journal article supplement (PMC4586461; doi:10.1038/srep14362), 2015-09-29
Supplement: srep14362-s2.pdf [file srep14362-s2.pdf]

**Downregulating p22phox ameliorates inflammatory response in Angiotensin II-induced oxidative stress by regulating MAPK and NF-κB pathways in ARPE-19 cells**

Yiguo Qiu<sup>1</sup>, Lifei Tao<sup>1</sup>, Chunyan Lei<sup>1</sup>, Jiaming Wang<sup>1</sup>, Peizeng Yang<sup>1</sup>, Qihong Li<sup>2</sup>, Bo Lei<sup>1</sup>

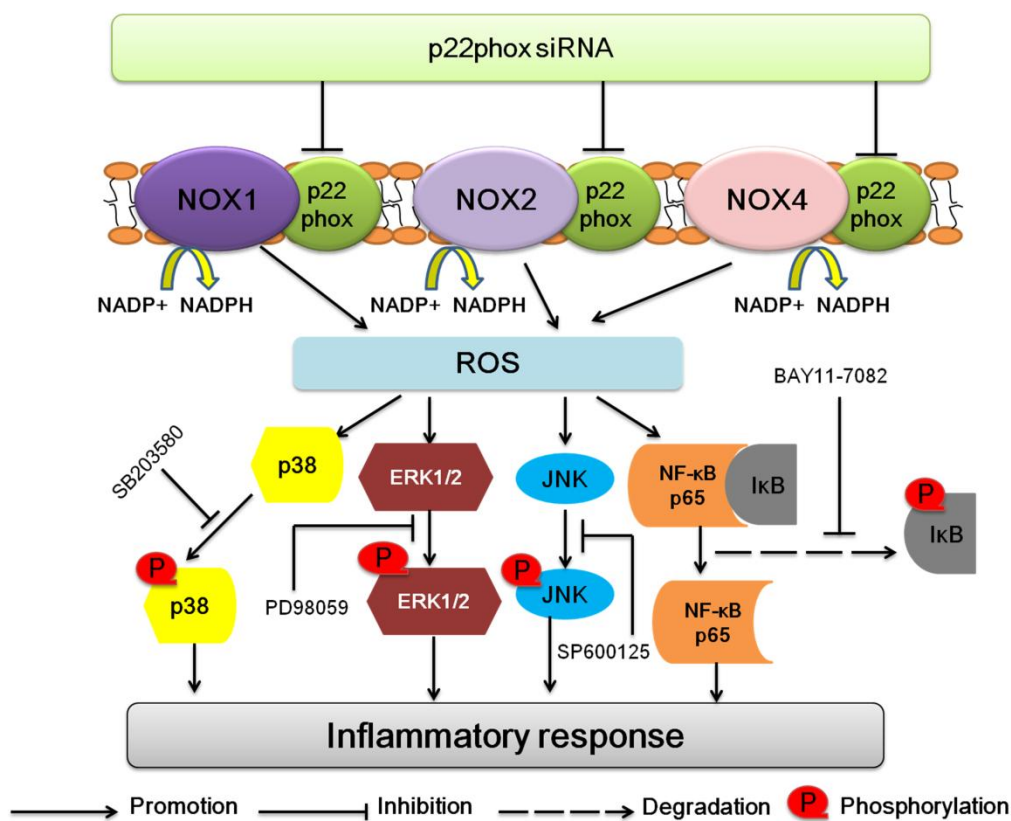

**Supplementary Figure S1. The schematic diagram of the anti-inflammatory effect played by downregulating p22phox.** Downregulating p22phox inhibits the activation of NOXs and the generation of intracellular ROS. The p38MAPK, ERK1/2, JNK and NF-κB pathways are involved in the anti-inflammatory effect.
